# Supplementary material for: Comparison of Cellulose Dissolution Behavior by Alkaline and Sulfuric Acid Solvents and Their Films’ Physical Properties
Source: MDPI journal article supplement (doi:10.3390/ma14185273), 2021-09-13
Supplement: s1 [file s1]

Supplementary Materials

# Comparison of Cellulose Dissolution Behavior by Alkaline and Sulfuric Acid Solvents and Their Films' Physical Properties

Jungsoo Han <sup>a</sup> and Yungbum Seo <sup>b\*</sup>

<sup>a</sup> Institute of Agricultural Science, Chungnam National University, Yousung-Gu, Gung-Dong 305-764, Korea.

<sup>b</sup> Department of Bio-Based Materials, Chungnam National University, Yousung-Gu, Gung-Dong 305-764, Korea.

\* Correspondence: ybseo@cnu.ac.kr

The supporting information documents consists 2 pages, 2 figures including XRD curves and TGA curves of samples used in this study.

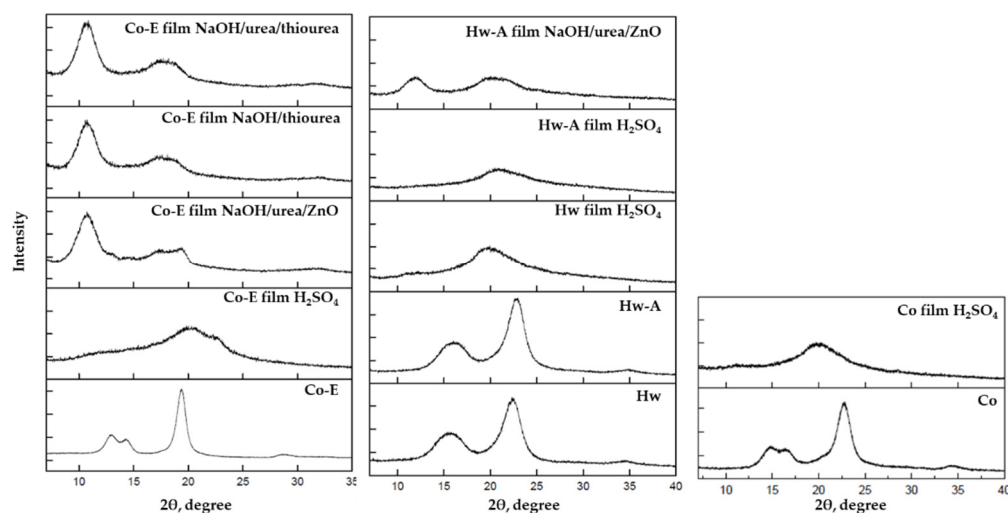

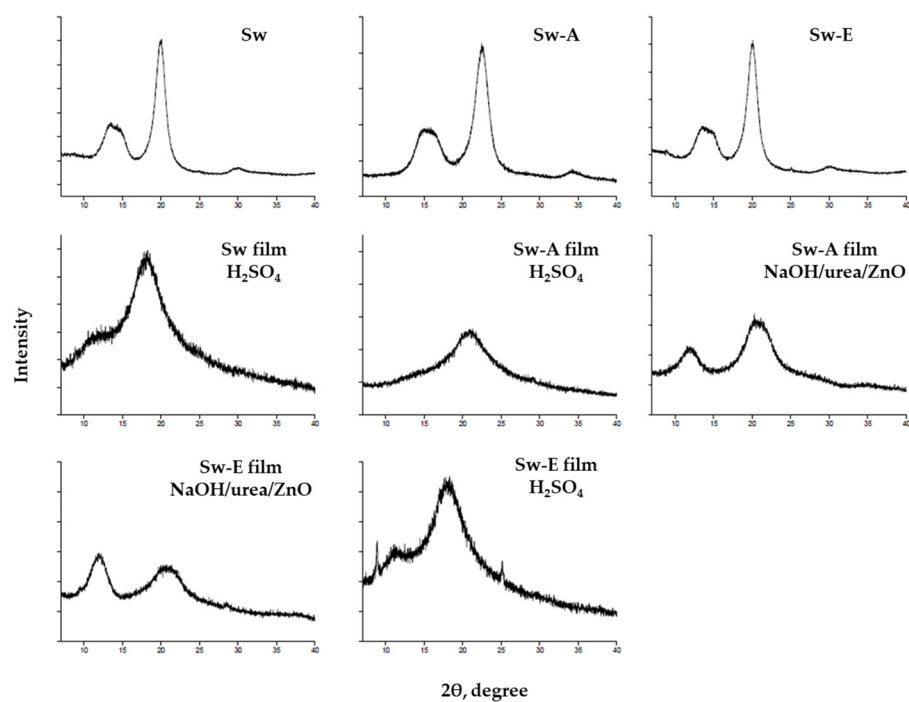

**Figure S1.** XRD curves of cellulose resources and their films prepared by alkaline and sulfuric acid solvents.

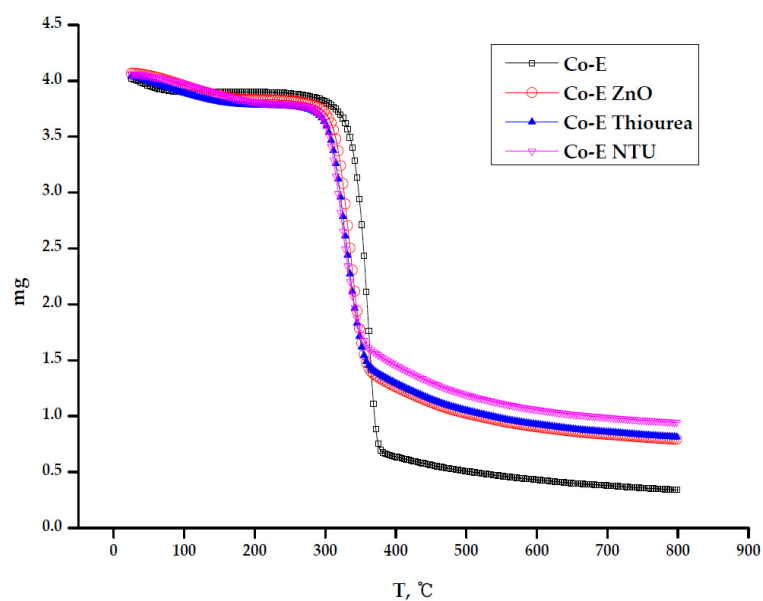

**Figure S2.** TGA curves of electron beam (20kGy) irradiated cotton linter (Co-E) and its cellulose films prepared by alkaline solvents, NaOH/urea/ZnO (Co-E ZnO), NaOH/thiourea (Co-E Thiourea), NaOH/urea/thiourea (Co-E NTU).
